# Supplementary material for: Effect of a Daily Text Messaging and Directly Supervised Therapy Intervention on Oral Mercaptopurine Adherence in Children With Acute Lymphoblastic Leukemia: A Randomized Clinical Trial
Source: PubMed Central journal article supplement (PMC7453312; doi:10.1001/jamanetworkopen.2020.14205), 2020-08-27
Supplement: jamanetwopen-3-e2014205-s002.pdf [file jamanetwopen-3-e2014205-s002.pdf]

## Supplementary Online Content

Bhatia S, Hageman L, Chen Y, et al. Effect of a daily text messaging and directly supervised therapy intervention on oral mercaptopurine adherence in children with acute lymphoblastic leukemia: a randomized clinical trial. *JAMA Netw Open*. 2020;3(8):e2014205. doi:10.1001/jamanetworkopen.2020.14205

**eAppendix 1.** Participating Children's Oncology Group Institutions

**eAppendix 2.** Supplemental Methods

**eTable 1.** Median Pre- to Post-Intervention Adherence Rates by Study Arm

**eTable 2.** Sensitivity Analysis

This supplementary material has been provided by the authors to give readers additional information about their work.

## Appendix 1. Participating Children's Oncology Group Institutions

| #  | Institution                                                   | Location                    |
|----|---------------------------------------------------------------|-----------------------------|
| 1  | Alfred I duPont Hospital for Children                         | Wilmington, Delaware        |
| 2  | Ann and Robert H. Lurie Children's Hospital of Chicago        | Chicago, Illinois           |
| 3  | Ascension Saint John Hospital                                 | Gross Point Woods, Michigan |
| 4  | Baylor College of Medicine                                    | Houston, Texas              |
| 5  | C S Mott Children's Hospital                                  | Ann Arbor, Michigan         |
| 6  | Carilion Clinic Children's Hospital                           | Roanoke, Virginia           |
| 7  | Children's Healthcare of Atlanta - Egleston                   | Atlanta, Georgia            |
| 8  | Children's Hospital Medical Center of Akron                   | Akron, Ohio                 |
| 9  | Children's Hospital of Los Angeles                            | Los Angeles, California     |
| 10 | Children's Hospital of Philadelphia                           | Philadelphia, Pennsylvania  |
| 11 | Children's Hospital of Pittsburgh of UPMC                     | Pittsburgh, Pennsylvania    |
| 12 | Children's Hospitals and Clinics of Minnesota - Minneapolis   | Minneapolis, Minnesota      |
| 13 | Children's National Medical Center                            | Washington, D.C.            |
| 14 | City of Hope                                                  | Duarte, California          |
| 15 | Columbia University Medical Center                            | New York, New York          |
| 16 | Cook Children's Medical Center                                | Fort Worth, Texas           |
| 17 | David Geffen School of Medicine at UCLA                       | Los Angeles, California     |
| 18 | Dell Children's Medical Center of Central Texas               | Austin, Texas               |
| 19 | Driscoll Children's Hospital                                  | Corpus Christi, Texas       |
| 20 | Duke University Medical Center                                | Durham, North Carolina      |
| 21 | Geisinger Medical Center                                      | Danville, Pennsylvania      |
| 22 | Helen DeVos Children's Hospital at Spectrum Health            | Grand Rapids, Michigan      |
| 23 | Lee Memorial Health System                                    | Fort Myers, Florida         |
| 24 | Mayo Clinic                                                   | Rochester, Minnesota        |
| 25 | Memorial Healthcare System - Joe DiMaggio Children's Hospital | Hollywood, Florida          |
| 26 | Mercy Hospital Saint Louis                                    | St. Louis, Missouri         |
| 27 | Miller Children's Hospital                                    | Long Beach, California      |
| 28 | Nationwide Children's Hospital                                | Columbus, Ohio              |
| 29 | Nemours Children's Clinic - Jacksonville                      | Jacksonville, Florida       |
| 30 | Nemours Children's Clinic - Pensacola                         | Pensacola, Florida          |
| 31 | Nevada Cancer Research Foundation CCOP                        | Las Vegas, Nevada           |
| 32 | New York University Langone Medical Center                    | New York, New York          |
| 33 | Novant Health Presbyterian Medical Center                     | Charlotte, North Carolina   |
| 34 | Ochsner Clinic Foundation                                     | New Orleans, Louisiana      |

| #  | Institution                                                    | Location                      |
|----|----------------------------------------------------------------|-------------------------------|
| 35 | Palmetto Health Richland                                       | Columbia, South Carolina      |
| 36 | Providence Sacred Heart Medical Center and Children's Hospital | Spokane, Washington           |
| 37 | Rady Children's Hospital - San Diego                           | San Diego, California         |
| 38 | Raymond Blank Children's Hospital                              | Des Moines, Iowa              |
| 39 | Riley Hospital for Children                                    | Indianapolis, Indiana         |
| 40 | Saint Mary's Hospital                                          | West Palm Beach, Florida      |
| 41 | Saint Vincent Hospital Cancer Center Green Bay                 | Green Bay, Wisconsin          |
| 42 | Seattle Children's Hospital                                    | Seattle, Washington           |
| 43 | Southern California Permanente Medical Group                   | Los Angeles, California       |
| 44 | The Children's Medical Center of Dayton                        | Dayton, Ohio                  |
| 45 | The Toledo Hospital/Toledo Children's Hospital                 | Toledo, Ohio                  |
| 46 | Tulane University Health Sciences Center                       | New Orleans, Louisiana        |
| 47 | University of Alabama at Birmingham                            | Birmingham, Alabama           |
| 48 | University of Hawaii                                           | Honolulu, Hawaii              |
| 49 | University of Illinois                                         | Chicago, Illinois             |
| 50 | University of Minnesota Medical Center-Fairview                | Minneapolis, Minnesota        |
| 51 | University of Mississippi Medical Center                       | Jackson, Mississippi          |
| 52 | University of New Mexico                                       | Albuquerque, New Mexico       |
| 53 | University of Oklahoma Health Sciences Center                  | Oklahoma City, Oklahoma       |
| 54 | University of Texas Health Science Center                      | San Antonio, Texas            |
| 55 | University of Texas Southwestern Medical Center                | Dallas, Texas                 |
| 56 | Vannie Cook Children's Clinic                                  | McAllen, Texas                |
| 57 | Wake Forest University Health Sciences                         | Winston-Salem, North Carolina |
| 58 | Washington University School of Medicine                       | St. Louis, Missouri           |
| 59 | Wayne State University                                         | Detroit, Michigan             |

## eAppendix 2. Supplemental Methods

### INTERVENTION COMPONENTS

#### *Theoretical Framework*

The theoretical framework for the intervention is the Extended Health Belief Model (Rosenstock, 1988). Within this framework, the likelihood of adherence to therapy is dependent upon the balance between perceived benefits and barriers to the therapy, weighed against perceived susceptibility to and severity of the illness being treated, within the context of perceived self-efficacy of the patient/parent to adhere to the treatment. The constructs addressed by the intervention program include perceived benefits, perceived barriers, perceived susceptibility, perceived severity, and self-efficacy.

#### *Multimedia Interactive Patient/Parent Educational Program*

The educational program, available in both English and Spanish, featured video vignettes of patients with ALL of various ages and racial/ethnic backgrounds and their parents, and addressed relevant health beliefs including perceived susceptibility to and severity of illness (i.e., leukemia), the purpose of 6MP, the perceived benefits and barriers to 6MP ingestion, and examples of how patients and parents had overcome such barriers (i.e., self-efficacy). The 20-minute interactive video was viewed in the clinic by parents and patients. Viewers selected vignettes featuring the patient/parent with whom they most closely identified in order to customize their learning experience.

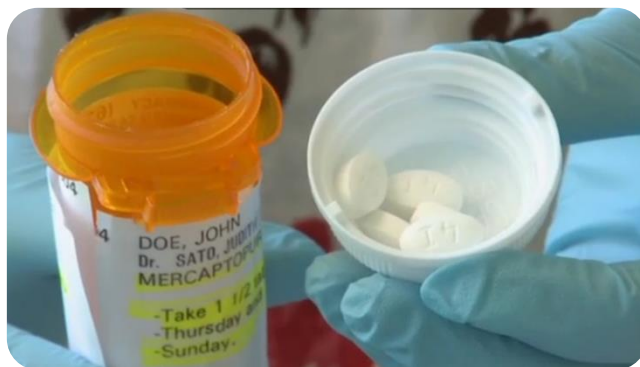

Animations and video clips featuring explanations from healthcare professionals were also integrated throughout the program. Technologic restrictions prevented viewers from skipping over required portions. The site research staff documented successfully viewing of the education program by patients/parents.

#### *Web-based Text Message Reminders*

A secure, HIPAA-compliant web-based application, *MEDACTIONPLAN/CT*, allowed healthcare providers to create customized 6MP schedules during routine clinic visits, specifying 6MP dose, time of administration, start date and duration. The healthcare provider used a streamlined interface within *MEDACTIONPLAN/CT* to activate automated SMS text messaging reminders to be delivered via cellular phone. Schedules were modified by healthcare providers as needed; reminders were updated concurrently. These customized reminders were delivered in the preferred language (English/Spanish) at the scheduled time of each 6MP dose to the 12-21-year-old patient and designated parent, and to the designated parent alone of the <12-year-old patient. The text messages included the drug name (6MP), prescribed dose (e.g., “take 2 tablets”), time due (e.g., “at 9:30 pm”), and name of healthcare provider (e.g., “Dr. Smith”). The entire process of creating the schedule and activating reminders was accomplished in the clinic. Parents/patients who did not have a cellular phone, or who had limited/no text-messaging capability on their personal plan, were issued cellular phones with unlimited text messaging capabilities for the duration of intervention.

| Time   | Wednesday<br>March 7 | Thursday<br>March 8 | Friday<br>March 9 | Saturday<br>March 10 | Sunday<br>March 11 | Monday<br>March 12 | Tuesday<br>March 13 |
|--------|----------------------|---------------------|-------------------|----------------------|--------------------|--------------------|---------------------|
| 8:30PM | 1<br>Tablet(s)       | 1<br>Tablet(s)      | 1½<br>Tablet(s)   | 1½<br>Tablet(s)      | 1½<br>Tablet(s)    | 1<br>Tablet(s)     | 1<br>Tablet(s)      |

| Time   | Wednesday<br>March 14 | Thursday<br>March 15 | Friday<br>March 16 | Saturday<br>March 17 | Sunday<br>March 18 | Monday<br>March 19 | Tuesday<br>March 20 |
|--------|-----------------------|----------------------|--------------------|----------------------|--------------------|--------------------|---------------------|
| 8:30PM | 1<br>Tablet(s)        | 1<br>Tablet(s)       | 1½<br>Tablet(s)    | 1½<br>Tablet(s)      | 1½<br>Tablet(s)    | 1<br>Tablet(s)     | 1<br>Tablet(s)      |

| Time   | Wednesday<br>March 21 | Thursday<br>March 22 | Friday<br>March 23 | Saturday<br>March 24 | Sunday<br>March 25 | Monday<br>March 26 | Tuesday<br>March 27 |
|--------|-----------------------|----------------------|--------------------|----------------------|--------------------|--------------------|---------------------|
| 8:30PM | 1<br>Tablet(s)        | 1<br>Tablet(s)       | 1½<br>Tablet(s)    | 1½<br>Tablet(s)      | 1½<br>Tablet(s)    | 1<br>Tablet(s)     | 1<br>Tablet(s)      |

**MEDACTIONPLAN/CT Provider Interface**

**Directly supervised therapy (DST)**

Once the patient had taken the 6MP, the ≥12-year-old patient and their parent, or the parent alone of the <12-year-old patient responded to the text message with a reply function on the cellular phone, providing central record of DST execution.

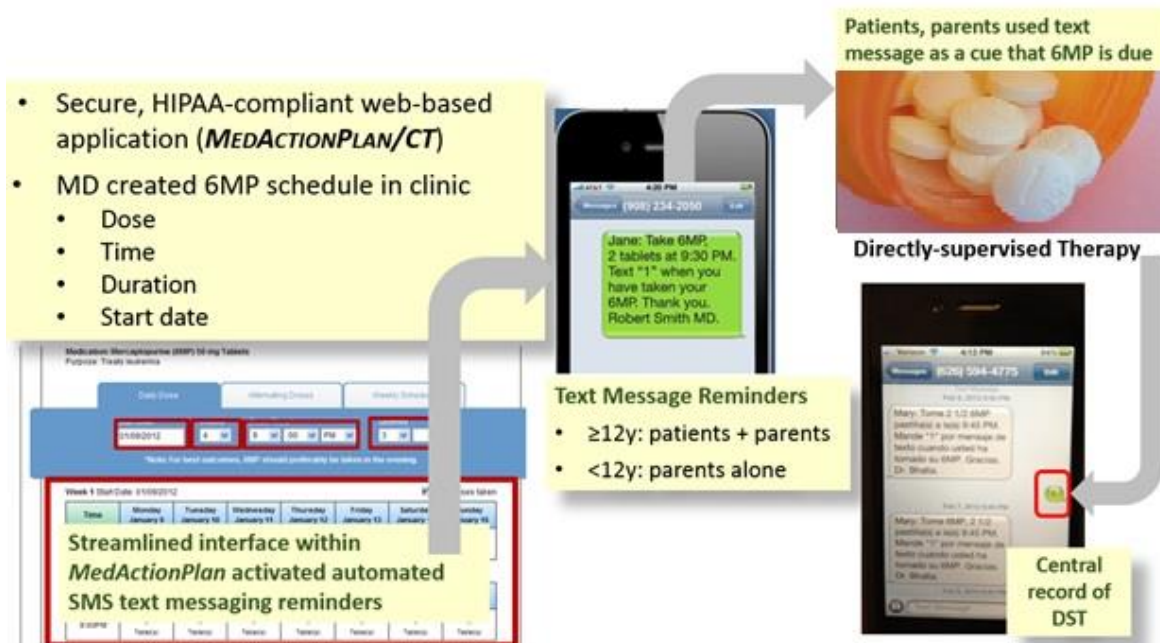

**ADHERENCE MONITORING**

**MEMS® Adherence Monitoring Device**

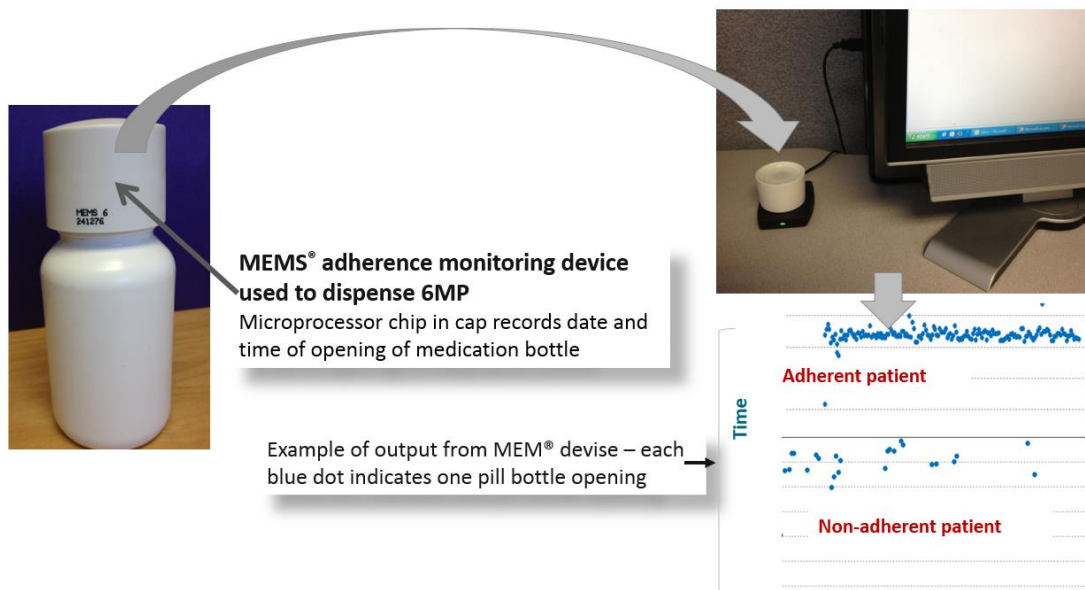

**TRIAL PROCEDURES**

Randomization occurred at the COG Statistics and Data Center on Day 1. For the first 28 days, all patients (IP, EDU) received 6MP from a MEMS® device without intervention; this period was used to calculate the baseline adherence

rates. The intervention lasted for 16 weeks. Patients and designated parents on both arms viewed the educational video during their scheduled clinic visit on Day 29. For patients on the IP arm, the patient’s healthcare provider activated automated text message reminders on study Days 29, 57, 85, 113 (days when patients returned to clinic for vincristine/steroid pulses), using *MEDACTIONPLAN/CT*. Participating sites submitted monthly reports (Maintenance Worksheets) for each patient, detailing prescribed 6MP dose for each day of the preceding month and dates when the prescriber held the 6MP dose for toxicity or illness. The study schema is outlined here.

**Study Schema**

| Study Procedures                               | Timeline |        |        |        |         |         |
|------------------------------------------------|----------|--------|--------|--------|---------|---------|
|                                                | Day 1    | Day 29 | Day 57 | Day 85 | Day 113 | Day 141 |
| Demographic questionnaire (IP, EDU)            | X        |        |        |        |         |         |
| Maintenance worksheets (IP, EDU)               |          | X      | X      | X      | X       | X       |
| MIPE education (IP, EDU)                       |          | X      |        |        |         |         |
| Daily personalized text message reminders (IP) |          | →      |        |        |         |         |
| Daily DST (IP)                                 |          | →      |        |        |         |         |
| MEMS monitoring of 6MP (IP, EDU)               | →        |        |        |        |         |         |
| Return MEMS Caps (IP, EDU)                     |          |        |        |        |         | X       |

IP=Intervention Package: Education and daily personalized text message reminders prompting directly supervised therapy; EDU=Education alone; MIPE=Multimedia interactive patient education; DST=Directly supervised therapy; MEMS=Medication Event Monitoring System; 6MP=6-mercaptopurine

**eTable 1. Median Pre- to Post-Intervention Adherence Rates by Study Arm**

| Age Group | EDUCATION |        |       |      | INTERVENTION |        |       |      |          |
|-----------|-----------|--------|-------|------|--------------|--------|-------|------|----------|
|           | N         | Median | Q1    | Q3   | N            | Median | Q1    | Q3   | P-value* |
| All       | 207       | -1.0%  | -5.4% | 0.0% | 226          | 0.0%   | -2.6% | 2.6% | < .001   |
| ≥12       | 71        | -1.8%  | -7.1% | 0.0% | 82           | 0.0%   | -1.9% | 3.6% | .004     |
| <12       | 136       | -0.9%  | -4.5% | 0.0% | 144          | 0.0%   | -2.7% | 2.5% | .06      |

\*Wilcoxon

**eTable 2.** Sensitivity Analysis

| <b>Sensitivity analysis*</b>                                                           | <b>Comparison</b> | <b>OR</b> | <b>95% CI</b> |       | <b>p-value</b> |
|----------------------------------------------------------------------------------------|-------------------|-----------|---------------|-------|----------------|
| All patients- time points with missing adherence were considered non-adherent (<95%)   | IP vs. EDU        | 1.3       | 0.9           | 1.797 | 0.1            |
| All patients- time points with missing adherence were considered adherent (≥95%)       | IP vs. EDU        | 1.4       | 1.0           | 1.928 | 0.03           |
| All patients with missing paternal/maternal education were considered low education    | IP vs. EDU        | 1.3       | 0.97          | 1.841 | 0.07           |
| All patients with missing paternal/maternal education were considered higher education | IP vs. EDU        | 1.3       | 0.97          | 1.833 | 0.08           |

\*The sensitivity analyses made the following assumptions: i) all patients with missing MEMs data were non-adherent (adherence rate <95%); all patients with missing MEMs data were adherent (adherence rate ≥95%); iii) all patients with missing parental education came from low-education families; iv) all patients with missing parent education came from high-education families.

OR=Odds Ratio; CI=Confidence Interval; IP=Intervention Package: Education and daily personalized text message reminders prompting directly supervised therapy; EDU=Education alone; MEMS=Medication Event Monitoring System
