# Supplementary material for: Effect of a Daily Text Messaging and Directly Supervised Therapy Intervention on Oral Mercaptopurine Adherence in Children With Acute Lymphoblastic Leukemia: A Randomized Clinical Trial
Source: PubMed Central journal article supplement (PMC7453312; doi:10.1001/jamanetworkopen.2020.14205), 2020-08-27
Supplement: jamanetwopen-3-e2014205-s003.pdf [file jamanetwopen-3-e2014205-s003.pdf]

## **Data Sharing Statement**

Bhatia. Effect of a Daily Text Messaging and Directly Supervised Therapy Intervention on Oral Mercaptopurine Adherence in Children With Acute Lymphoblastic Leukemia. *JAMA Netw Open*. Published August 27, 2020. 10.1001/jamanetworkopen.2020.14205

### **Data**

**Data available:** No
